# Supplementary material for: DNA Hypomethylation Affects Cancer-Related Biological Functions and Genes Relevant in Neuroblastoma Pathogenesis
Source: PLoS One. 2012 Nov 7;7(11):e48401. doi: 10.1371/journal.pone.0048401 (PMC3492354; doi:10.1371/journal.pone.0048401)
Supplement: Table S3 — A: Gene expression data from microarrays of NB-specific genes. Table S3B: Gene-ontology terms enrichment for differentially methylated genes. Table S3C: Polycomb Repressive Complex 2 (PCR2) target genes and promoter class distribution of NB-specific genes. Table S3D: Chromosomal distribution of NB-specific genes. (XLSX) [file pone.0048401.s005.xlsx]

## Sheet: Table S3A
TABLE S3A
Microarray gene expression data of NB-specific genes
TargetID: identification of CpG site number in Infinium HumanMethylation27 BeadChip.
Expression levels were reported in neuroblastomas as compared to ganglioneuromas/ganglioneuroblastomas and normal fetal brain (reference samples). Only expression data concordant in all reference samples are reported.
Methyl Status	TargetID	Gene	NCBI Ref. Seq.	Expression levels	Bonferroni p-value
HyperM	cg13590277	SYNPO	NM_007286.3	NB < reference samples	4.91497e-45
	cg26764244	GNG12	NM_018841.3	NB < reference samples	1.14301e-41
	cg14542839	PAMR1	NM_015430.2	NB < reference samples	1.07121e-40
	cg14409083	EMP1	NM_001423.1	NB < reference samples	2.8909e-34
	cg21554552	RASSF1	NM_007182.4	NB < reference samples	1.28294e-23
	cg06637774	P2RY6	NM_004154.3	NB < reference samples	1
	cg24235037	PLA2R1	NM_007366.3	NB < reference samples	1
	cg18702197	HOXD3	NM_006898.4	NB > reference samples	1.16657e-20
	cg26904406//cg19118533	TRAF3IP2	NM_147200.1	NB > reference samples	1.90075e-11
	cg17814481	FBP1	NM_000507.2	NB > reference samples	0.000166285
	cg24101578	CDH22	NM_021248.1	NB > reference samples	0.000811284
	cg26556719	PCDHA13	NM_018904.2	NB > reference samples	0.00384627
	cg26053864	ACTC	NM_005159.3	NB > reference samples	1
	cg17309462	C20orf38	NM_018327.1	non data avaiable
	cg26937500	CARD11	NM_032415.2	non data avaiable
	cg00230502	CCDC60	NM_178499.2	non data avaiable
	cg15364618	CIDEB	NM_014430.1	non data avaiable
	cg20427879// cg08831348	EML2	NM_012155.1	non data avaiable
	cg03716999	FLJ46380	NM_207396.1	non data avaiable
	cg07705835	IL17RC	NM_032732.2	non data avaiable
	cg23283495	IRF6	NM_006147.2	non data avaiable
	cg21608489	POU2F2	NM_002698.1	non data avaiable
	cg23769143	TIMP4	NM_003256.2	non data avaiable
HypoM	cg04144768	DDC	NM_000790.2	NB > reference samples	1.91849e-10
	cg07824742	DBH	NM_000787.2	NB > reference samples	3.70469e-10
	cg00819362	CLIPR-59	NM_015526.1	NB > reference samples	4.47307e-09
	cg00209066	BRD1	NM_014577.1	NB > reference samples	1.50192e-05
	cg24329717	P2RX3	NM_002559.2	NB > reference samples	1.6141e-05
	cg13694749	SCN4A	NM_000334.3	NB > reference samples	2.11123e-05
	cg26927807	BTBD2	NM_017797.3	NB > reference samples	0.000144998
	cg26862286	NCL	NM_005381.2	NB > reference samples	0.000222242
	cg04717045 // cg02723533	CCND1	NT_078088.3	NB > reference samples	0.00029786
	cg24818418	EGF	NM_001963.2	NB > reference samples	0.0073483
	cg09736922	THPO	NM_000460.2	NB > reference samples	0.10897
	cg04881903	CAPG	NM_001747.2	NB > reference samples	0.140441
	cg26385743	IMP4	NM_033416.1	NB > reference samples	0.425642
	cg07897701	ABP1	NM_001091.2	NB > reference samples	1
	cg11879188	ABO	NM_020469.2	NB > reference samples	1
	cg23173910	ACTG2	NM_001615.3	NB > reference samples	1
	cg16358738	AGXT	NM_000030.1	NB > reference samples	1
	cg26353877	APCS	NM_001639.2	NB > reference samples	1
	cg27436184	APOC2	NM_000483.3	NB > reference samples	1
	cg21407055	ART1	NM_004314.1	NB > reference samples	1
	cg07011110	BTN1A1	NM_001732.1	NB > reference samples	1
	cg24841244	CD3D	NM_000732.3	NB > reference samples	1
	cg14102807	CD19	NM_001770.3	NB > reference samples	1
	cg03574571	CD22	NM_001771.1	NB > reference samples	1
	cg21505334	CEACAM5	NM_004363.1	NB > reference samples	1
	cg26738010	CETN1	NM_004066.1	NB > reference samples	1
	cg07297178	CEACAM7	NM_006890.1	NB > reference samples	1
	cg02882813	CST5	NM_001900.4	NB > reference samples	1
	cg05910970	CYP2A6	NM_000762.4	NB > reference samples	1
	cg20075229	CYP2A7	NM_030589.2	NB > reference samples	1
	cg11834681	CYP2A13	NM_000766.3	NB > reference samples	1
	cg26822241	CYP2C9	NM_000771.2	NB > reference samples	1
	cg16879596	CYP3A5	NM_000777.2	NB > reference samples	1
	cg26298099	ESRRB	NM_004452.2	NB > reference samples	1
	cg01731341	FGF6	NM_020996.1	NB > reference samples	1
	cg21570818	FUT5	NM_002034.2	NB > reference samples	1
	cg05444024	FUT6	NM_000150.1	NB > reference samples	1
	cg07711097	GML	NM_002066.1	NB > reference samples	1
	cg03404502	GPR18	NM_005292.2	NB > reference samples	1
	cg03517000	GSTA2	NM_000846.3	NB > reference samples	1
	cg23834593	HNF4A	NM_000457.3	NB > reference samples	1
	cg21023114	IFNA14	NM_002172.1	NB > reference samples	1
	cg27083787	IL1A	NM_000575.3	NB > reference samples	1
	cg09526693	IL2	NM_000586.2	NB > reference samples	1
	cg05440289	IVL	NM_005547.2	NB > reference samples	1
	cg15627025	KIR3DL1	NM_013289.1	NB > reference samples	1
	cg15983005	KRTHA3A	NM_004138.2	NB > reference samples	1
	cg16791508	KRTHB3	NM_002282.2	NB > reference samples	1
	cg00269932	LAIR2	NM_002288.3	NB > reference samples	1
	cg01726767	LALBA	NM_002289.2	NB > reference samples	1
	cg00208830	LAMC2	NM_005562.1	NB > reference samples	1
	cg17078393	LCK	NM_005356.2	NB > reference samples	1
	cg17761453 // cg27626424	LOR	NM_000427.1	NB > reference samples	1
	cg15589427	MUC4	NM_138298.1	NB > reference samples	1
	cg12339029	MYL1	NM_079420.1	NB > reference samples	1
	cg26813458	CEACAM6	NM_002483.3	NB > reference samples	1
	cg04483754	NOS2A	NM_000625.3	NB > reference samples	1
	cg03264414	PAEP	NM_001018049.1	NB > reference samples	1
	cg20357806	PPBP	NM_002704.2	NB > reference samples	1
	cg02813121	S100A12	NM_005621.1	NB > reference samples	1
	cg18738906	SCNN1A	NM_001038.4	NB > reference samples	1
	cg20556988	CCL1	NM_002981.1	NB > reference samples	1
	cg10190509 // cg05766474	CCL16	NM_004590.2	NB > reference samples	1
	cg09395732	SLC6A11	NM_014229.1	NB > reference samples	1
	cg21541083	STXBP2	NM_006949.1	NB > reference samples	1
	cg18330203	TNNT2	NM_000364.2	NB > reference samples	1
	cg25042226	PAX8	NM_013951.2	NB > reference samples	1
	cg05348870	TNFSF14	NM_003807.2	NB > reference samples	1
	cg18960218	SLC7A7	NM_003982.2	NB > reference samples	1
	cg27496506	TGM5	NM_201631.1	NB > reference samples	1
	cg10099900	PSMF1	NM_178578.1	NB > reference samples	1
	cg00344358	GDF11	NM_005811.2	NB > reference samples	1
	cg01567482	RGS14	NM_006480.4	NB > reference samples	1
	cg13916742	SCGB1D1	NM_006552.1	NB > reference samples	1
	cg26136776	KLF1	NM_006563.2	NB > reference samples	1
	cg17628717	HECW1	NM_015052.2	NB > reference samples	1
	cg12850636	TJP3	NM_014428.1	NB > reference samples	1
	cg02100848	C3orf32	NM_015931.1	NB > reference samples	1
	cg25813714	CYP4F12	NM_023944.1	NB > reference samples	1
	cg06210526	CYP2F1	NM_000774.3	NB < reference samples	1
	cg22340747	GATM	NM_001482.1	NB < reference samples	1.53797e-20
	cg00425710	MT1A	NM_005946.2	NB < reference samples	0.347082
	cg06667406	AASS	NM_005763.2	NB < reference samples	1
	cg24697329	ARHGEF4	NM_015320.2	NB < reference samples	0.645299
	cg19302283	BTC	NM_001729.1	discordant data
	cg00501366	ALOX12B	NM_001139.1	discordant data
	cg19465374	AZGP1	NM_001185.2	discordant data
	cg10045881	CHI3L2	NM_001025197.1	discordant data
	cg13447818	FLG	NM_002016.1	discordant data
	cg07944811	GCK	NM_000162.2	discordant data
	cg13833831	MATK	NM_002378.2	discordant data
	cg13434203	PSG3	NM_021016.2	discordant data
	cg10408410	RLBP1	NM_000326.3	discordant data
	cg25548825	TBX10	NM_005995.2	discordant data
	cg17741572	CFB	NM_001710.4	discordant data
	cg17399166	CD1D	NM_001766.2	discordant data
	cg09142399	CRYZ	NM_001889.2	discordant data
	cg14694011	CYP19A1	NM_000103.2	discordant data
	cg02658251	DEFB4	NM_004942.2	discordant data
	cg11386709	EPB41L2	NM_001431.1	discordant data
	cg14696870	FCER1A	NM_002001.2	discordant data
	cg00974864	FCGR3B	NM_000570.2	discordant data
	cg26164184	FCN2	NM_004108.2	discordant data
	cg18063149	FMO3	NM_001002294.1	discordant data
	cg08766149	GZMB	NM_004131.3	discordant data
	cg04705866	GZMK	NM_002104.2	discordant data
	cg07026910	INPP5D	NM_001017915.1	discordant data
	cg03993463	KCNJ15	NM_002243.3	discordant data
	cg14533138	KRTHA3B	NM_002279.3	discordant data
	cg20320468	LAIR1	NM_002287.2	discordant data
	cg10464775	LAMP1	NM_005561.2	discordant data
	cg01909245	LSP1	NM_002339.2	discordant data
	cg21948655	SMCP	NM_030663.2	discordant data
	cg01668126	MSR1	NM_002445.2	discordant data
	cg20234959	NID1	NM_002508.1	discordant data
	cg27100123	SERPINB8	NM_198833.1	discordant data
	cg22220722	PLA2G2A	NM_000300.2	discordant data
	cg21256656	KLK6	NM_002774.3	discordant data
	cg06720660	RNASE6	NM_005615.2	discordant data
	cg20714328	THBS4	NM_003248.3	discordant data
	cg03021690	TNFAIP2	NM_006291.2	discordant data
	cg15815843	MFAP5	NM_003480.2	discordant data
	cg10213812	FOXN1	NM_003593.2	discordant data
	cg14287742 // cg24407065	BLZF1	NM_003666.2	discordant data
	cg05106502	SCAP1	NM_003726.2	discordant data
	cg02431964	MARCO	NM_006770.3	discordant data
	cg10677144	MYOM1	NM_003803.2	discordant data
	cg20747455	MATN4	NM_003833.2	discordant data
	cg24030627	FCGBP	NM_003890.1	discordant data
	cg07264679	CD163	NM_004244.3	discordant data
	cg25890048	OR5I1	NM_006637.1	discordant data
	cg08684473 // cg20649991	LILRB5	NM_006840.2	discordant data
	cg02737335 // cg24919884	ARHGEF16	NM_014448.2	discordant data
	cg09480837	PLCE1	NM_016341.2	discordant data
	cg11465372	KRT2B	NM_015848.1	discordant data
	cg21991396	CIAS1	NM_183395.1	discordant data
	cg00698688	SULT2B1	NM_177973.1	non data avaiable
	cg24107142	HK2	NM_000189.4	non data avaiable
	cg13605579	ALPP	NM_001632.2	non data avaiable
	cg18374517	ALPPL2	NM_031313.1	non data avaiable
	cg19250891	ATP1A4	NM_144699.2	non data avaiable
	cg25995460	C1QA	NM_015991.1	non data avaiable
	cg02903525	C5AR1	NM_001736.2	non data avaiable
	cg11976616	C6	NM_000065.1	non data avaiable
	cg00534856	CGB	NM_000737.2	non data avaiable
	cg22294577	SLC26A3	NM_000111.1	non data avaiable
	cg17446142	GDF9	NM_005260.2	non data avaiable
	cg12428416	GJA3	NM_021954.2	non data avaiable
	cg03782727	FFAR1	NM_005303.1	non data avaiable
	cg26026726	GPR42	NM_005305.1	non data avaiable
	cg15479752	FFAR2	NM_005306.1	non data avaiable
	cg01598642	HBG1	NM_000559.2	non data avaiable
	cg04345908	HLA-DQB2	NM_182549.1	non data avaiable
	cg10746737	HLA-DRB5	NM_002125.3	non data avaiable
	cg20672044	HPR	NM_020995.3	non data avaiable
	cg12775613	HTR1F	NM_000866.1	non data avaiable
	cg22039846	KIR2DL1	NM_014218.1	non data avaiable
	cg08459368	SCGB2A1	NM_002407.1	non data avaiable
	cg16466334	MMP3	NM_002422.3	non data avaiable
	cg22407504	MUC5B	XM_039877.12	non data avaiable
	cg07879977	OR1F1	NM_012360.1	non data avaiable
	cg14014613	OR3A1	NM_002550.1	non data avaiable
	cg09299388	PGK2	NM_138733.2	non data avaiable
	cg02442161	PI3	NM_002638.2	non data avaiable
	cg23527067	PRH2	NM_005042.2	non data avaiable
	cg07039113 // cg16139316	S100A9	NM_002965.2	non data avaiable
	cg12907644	SAA2	NM_030754.2	non data avaiable
	cg00152644	SPRR2E	NM_001024209.1	non data avaiable
	cg04138756	SPRR3	NM_005416.1	non data avaiable
	cg08603768	WNT8A	NM_031933.1	non data avaiable
	cg07506795	ZNF19	NM_006961.2	non data avaiable
	cg06351503	RDBP	NM_002904.5	non data avaiable
	cg22510822	OR1E2	NM_003554.1	non data avaiable
	cg05674036	OR3A3	NM_012373.1	non data avaiable
	cg15096123	KLK4	NM_004917.2	non data avaiable
	cg27235662	CLDN16	NM_006580.2	non data avaiable
	cg23326301	ADAM30	NM_021794.2	non data avaiable
	cg26917999	LZTS1	NM_021020.1	non data avaiable
	cg03387723	SCMH1	NM_012236.1	non data avaiable
	cg13453139	PIK3R5	NM_014308.1	non data avaiable
	cg00488300	TPSG1	NM_012467.2	non data avaiable
	cg07142319	PLA2G2D	NM_012400.2	non data avaiable
	cg13792279	CLDN17	NM_012131.1	non data avaiable
	cg04645174	OR7A17	NM_030901.1	non data avaiable
	cg16612699 // cg14620221	OR8B8	NM_012378.1	non data avaiable
	cg19784470	OR7C2	NM_012377.1	non data avaiable
	cg24992780	OR7C1	NM_198944.1	non data avaiable
	cg09995854	IL1F8	NM_014438.3	non data avaiable
	cg27305662	C6orf15	NM_014070.1	non data avaiable
	cg17754680	NPC1L1	NM_013389.1	non data avaiable
	cg22193702	PADI1	NM_013358.1	non data avaiable
	cg15092802	OBP2A	NM_014582.1	non data avaiable
	cg16713808 // cg19370451	CRNN	NM_016190.1	non data avaiable
	cg01103730	IL20	NM_018724.3	non data avaiable
	cg01369413	UBQLN3	NM_017481.2	non data avaiable
	cg11380128	PRLH	NM_015893.1	non data avaiable
	cg01459162	PADI3	NM_016233.1	non data avaiable
	cg12619162	FXYD4	NM_173160.2	non data avaiable
	cg13265003	SLC37A1	NM_018964.3	non data avaiable
	cg25023829	H2BFS	NM_017445.1	non data avaiable
	cg11811840	UGT1A1	NM_000463.2	non data avaiable
	cg08996986	EPS8L1	NM_017729.2	non data avaiable
	cg03510310	HRASLS2	NM_017878.1	non data avaiable
	cg07259382	MARCH1	NM_017923.2	non data avaiable
	cg17947599	ACOXL	NM_018308.1	non data avaiable
	cg00273124	NOLA2	NM_017838.3	non data avaiable
	cg25214366	DEFB103A	NM_018661.2	non data avaiable
	cg00881370	LOC55908	NM_018687.3	non data avaiable
	cg18534730 // cg09422355	CABP5	NM_019855.3	non data avaiable
	cg16462075 //cg00644033	MUC3B	XM_168578.6	non data avaiable
	cg11128808	CACNG6	NM_145814.1	non data avaiable
	cg05500074	TSKS	NM_021733.1	non data avaiable
	cg06066303	MS4A5	NM_023945.2	non data avaiable
	cg08453096 // cg25781162	ABCG5	NM_022436.2	non data avaiable
	cg16087263	PLA2G2F	NM_022819.2	non data avaiable
	cg13364756	CYP3A43	NM_022820.3	non data avaiable
	cg09196942	PRAMEF1	NM_023013.1	non data avaiable
	cg24363955	FLJ14054	NM_024563.2	non data avaiable
	cg15120247	C1orf54	NM_024579.1	non data avaiable
	cg27446185	VTCN1	NM_024626.1	non data avaiable
	cg27285599	FLJ13841	NM_024702.1	non data avaiable
	cg07621456 // cg24287460	CCDC48	NM_024768.1	non data avaiable
	cg24024214	BTNL8	NM_024850.1	non data avaiable
	cg15996947	L2HGDH	NM_024884.1	non data avaiable
	cg13696012	BPIL1	NM_025227.1	non data avaiable
	cg00756887	PVRL4	NM_030916.1	non data avaiable
	cg00819310	VANGL1	NM_138959.1	non data avaiable
	cg03329572	FCRL5	NM_031281.1	non data avaiable
	cg16242770	KRTAP17-1	NM_031964.1	non data avaiable
	cg16413535	TKTL2	NM_032136.3	non data avaiable
	cg04901273	TBC1D3	NM_032258.1	non data avaiable
	cg18434152	PROK1	NM_032414.2	non data avaiable
	cg11920519	MAP1LC3A	NM_181509.1	non data avaiable
	cg02044879	PLA2G12B	NM_032562.2	non data avaiable
	cg06862644	SPATA22	NM_032598.2	non data avaiable
	cg07586911	NYD-SP18	NM_032599.1	non data avaiable
	cg26014197	ZNF206	NM_032805.1	non data avaiable
	cg22563697	PPP1R16A	NM_032902.5	non data avaiable
	cg02067021	DNAJC5B	NM_033105.3	non data avaiable
	cg18986165	SIGLEC12	NM_033329.1	non data avaiable
	cg03602500 // cg25033144	FLJ00060	NM_033206.1	non data avaiable
	cg02844051	ZD52F10	NM_033317.2	non data avaiable
	cg16225091	ODF3	NM_053280.3	non data avaiable
	cg24311282	SIGLEC11	NM_052884.1	non data avaiable
	cg23683201	SLC22A9	NM_080866.2	non data avaiable
	cg12188860	TOP1MT	NM_052963.1	non data avaiable
	cg01078434	MAS1L	NM_052967.1	non data avaiable
	cg17981339	SBEM	NM_058173.1	non data avaiable
	cg12133004	C12orf54	NM_152319.2	non data avaiable
	cg04450876	FAM112B	NM_144594.1	non data avaiable
	cg21624282	LOC122258	NM_145248.2	non data avaiable
	cg18389810	C14orf8	NM_173846.3	non data avaiable
	cg26259865	LOC124220	NM_145252.1	non data avaiable
	cg25221254 // cg12999109	ASAH3	NM_133492.1	non data avaiable
	cg26015133	FCRLM2	NM_001002901.2	non data avaiable
	cg18241647	WFDC12	NM_080869.1	non data avaiable
	cg25737664	SIRPD	NM_178460.1	non data avaiable
	cg02309431	BPIL3	NM_174897.1	non data avaiable
	cg01671881	C20orf71	NM_178466.2	non data avaiable
	cg15495837	TRIM43	NM_138800.1	non data avaiable
	cg16660041	IQCF1	NM_152397.1	non data avaiable
	cg15905124 // cg05731779	MGC13034	NM_153217.1	non data avaiable
	cg12213910	RAET1E	NM_139165.1	non data avaiable
	cg09911342	ASZ1	NM_130768.1	non data avaiable
	cg00213044	KRT6C	NM_058242.1	non data avaiable
	cg07873488	MUC17	NM_001004430.1	non data avaiable
	cg00769470	DEFB129	NM_080831.2	non data avaiable
	cg11154879	C20orf151	NM_080833.1	non data avaiable
	cg13349425	C5orf20	NM_130848.1	non data avaiable
	cg21964481	SLC34A3	NM_080877.1	non data avaiable
	cg18641937	ITLN2	NM_080878.2	non data avaiable
	cg17749384	MPP7	NM_173496.2	non data avaiable
	cg02423618	SPATA8	NM_173499.2	non data avaiable
	cg08402568	MGC34647	NM_152456.1	non data avaiable
	cg21640749	CD300LF	NM_139018.2	non data avaiable
	cg27513764	EFCAB3	NM_173503.1	non data avaiable
	cg06468695	CCDC42	NM_144681.1	non data avaiable
	cg07123548	HIPK4	NM_144685.3	non data avaiable
	cg24172553	FLJ25660	NM_152481.1	non data avaiable
	cg19987219	FLJ32011	NM_182516.1	non data avaiable
	cg15516226	BTNL9	NM_152547.2	non data avaiable
	cg10377274	PATE	NM_138294.2	non data avaiable
	cg02432101	TCEB3C	NM_145653.2	non data avaiable
	cg01227741 // cg01827098	GIMAP7	NM_153236.3	non data avaiable
	cg09205751	NALP6	NM_138329.1	non data avaiable
	cg20423977	PLAC4	NM_182832.1	non data avaiable
	cg18140857	RDHE2	NM_138969.2	non data avaiable
	cg11845202	K5B	NM_173352.1	non data avaiable
	cg08728865	NALP7	NM_139176.2	non data avaiable
	cg01390445	LIPH	NM_139248.2	non data avaiable
	cg05248781	LCE5A	NM_178438.3	non data avaiable
	cg15532088	C17orf66	NM_152781.2	non data avaiable
	cg10705251	ZNF683	NM_173574.1	non data avaiable
	cg01774645	ARHGAP30	NM_181720.2	non data avaiable
	cg12061127	WFDC9	NM_147198.2	non data avaiable
	cg22988566	WFDC10B	NM_172006.2	non data avaiable
	cg26589285	IL29	NM_172140.1	non data avaiable
	cg24580001	FLJ37970	NM_032251.3	non data avaiable
	cg21277505	LOC284361	NM_175063.3	non data avaiable
	cg01144251	KLK9	NM_012315.1	non data avaiable
	cg12334759	C19orf19	NM_182577.1	non data avaiable
	cg15975283	SLC9A11	NM_178527.2	non data avaiable
	cg14062083	KRTAP13-4	NM_181600.1	non data avaiable
	cg13439299	DNAJC5G	NM_173650.1	non data avaiable
	cg22445920	SLC36A3	NM_181774.2	non data avaiable
	cg26577529	KRT6E	NM_173086.2	non data avaiable
	cg07017706	K6IRS3	NM_175068.2	non data avaiable
	cg24423088	KRTAP8-1	NM_175857.3	non data avaiable
	cg16431978	KRTAP13-3	NM_181622.1	non data avaiable
	cg07374637	KRTAP19-5	NM_181611.1	non data avaiable
	cg08475088	NALP9	NM_176820.2	non data avaiable
	cg09546307	CLEC4D	NM_080387.4	non data avaiable
	cg04816348	CLEC4G	NM_198492.1	non data avaiable
	cg07221454	MS4A10	NM_206893.1	non data avaiable
	cg10173723	KRT25C	NM_181537.2	non data avaiable
	cg18129786	ZNF445	NM_181489.4	non data avaiable
	cg04484789	KRT25B	NM_181539.3	non data avaiable
	cg06872381	DPPA3	NM_199286.2	non data avaiable
	cg27050793 // cg23680518	SBSN	NM_198538.1	non data avaiable
	cg15140807	FLJ31222	NM_207388.1	non data avaiable
	cg05241571	UNQ467	NM_207392.1	non data avaiable
	cg03364504	FLJ36116	XR_000536.1	non data avaiable
	cg09408780	SFTPG	NM_205854.1	non data avaiable
	cg20416179	C6orf71	NM_203395.1	non data avaiable
	cg03044435	FLJ35816	NM_207489.1	non data avaiable
	cg21168884	C6orf122	NM_207502.1	non data avaiable
	cg23350580 // cg02601403	TBC1D3C	NM_001001418.2	non data avaiable
	cg04520391	PRB2	NM_006248.1	non data avaiable

## Sheet: Table S3B
TABLE S3B
Gene Ontology terms significantly enriched in differentially methylated genes in neuroblastoma
p-value = Benjamini-Hochberg correction. Significant p-value<0.05
None of the Gene Ontology (GO) identified for the Hypermethylated NB-specific genes and differentially methylated genes between NB subgroups had significant p-values.
HypoM NB-specific genes
Gene Ontology term	N. genes	Genes	p-value
GO:0006952 Defense response	34	LALBA,LSP1,SAA2,S100A9,WFDC12,S100A12,RNASE6,NALP7,LILRB5,C6,C5AR1,H2BFS,CFB,CIAS1,HPR,FCN2,PLA2G2A,NOS2A,CD19,DEFB129,DEFB103A,APCS,IL1A,IL29,PSG3,CD1D,FOXN1,PLA2G2D,C1QA,IFNA14,PPBP,DEFB4,CD163,CCL16	3.78785e-06
GO:0006955 Immune response	32	TNFSF14,CD300LF,KIR2DL1,CCL1,HLA-DRB5,C6,LAIR1,C5AR1,LILRB5,DBH,CFB,INPP5D,IL2,CIAS1,FCN2,KIR3DL1,NOS2A,VTCN1,STXBP2,IL1A,IL1F8,IL29,CD1D,CLEC4D,C1QA,SCAP1,PPBP,DEFB4,FCGR3B,RAET1E,AZGP1,CCL16	0.000338296
GO:0002376 Immune system process	39	S100A9,SAA2,KIR2DL1,LILRB5,HLA-DRB5,CCL1,CD300LF,TNFSF14,LAIR1,C6,C5AR1,THPO,DBH,CFB,INPP5D,IL2,CIAS1,FCN2,KIR3DL1,NOS2A,CD19,VTCN1,STXBP2,CD3D,IL1A,IL29,IL1F8,CD1D,CLEC4D,KLF1,C1QA,SCAP1,PPBP,DEFB4,FCGR3B,RAET1E,LCK,AZGP1,CCL16	0.000633782
GO:0050896 Response to stimulus	89	OR7C2,OR5I1,CYP2F1,GJA3,GCK,LILRB5,RLBP1,TNFSF14,LSP1,P2RX3,H2BFS,FCER1A,THPO,OBP2,DBH,INPP5D,OR7C1,HPR,MMP3,FCN2,IVL,PLA2G2A,CRNN,KIR3DL1,NOS2A,CD19,PRLH,DEFB10A,IL1A,OR3A3,IL1F8,CLEC4D,FOXN1,KLK6,IFNA14,SCAP1,FCGR3B,RAET1E,OR8B8,UGT1A1,CCL16,MAP1LC3A,HLA-DRB5,KIR2DL1,SAA2,WFDC12,CD300LF,OR1E2,LAIR1,RNASE6,GATM,OR1F1,GML,SPRR3,CCL1,S100A9,LALBA,S100A12,NALP7,C6,TNNT2,SCNN1A,C5AR1,HNF4A,CETN1,DDC…	0.00337287
GO:0050776 Regulation of immune response	14	CD1D,CD19,FCN2,IL29,NOS2A,C6,STXBP2,C1QA,DEFB103A,SCAP1,FCER1A,CFB,INPP5D,IL2	0.0277743
GO:0042742 Defense response to bacterium	10	H2BFS,NOS2A,PLA2G2A,DEFB129,WFDC12,DEFB103A,PPBP,LALBA,DEFB4,S100A12	0.0327026
GO:0002684 Positive regulation of immune system process	14	C6,CD19,FCN2,TNFSF14,NOS2A,C1QA,IL29,SCAP1,CD1D,FCER1A,LCK,CFB,INPP5D,IL2	0.0396076
GO:0006950 Response to stress	48	GATM,WFDC12,MAP1LC3A,RNASE6,SAA2,LILRB5,LSP1,GML,GJA3,SPRR3,LALBA,S100A9,S100A12,NALP7,P2RX3,C6,C5AR1,HNF4A,CETN1,H2BFS,FCER1A,DBH,CFB,CIAS1,HPR,CCND1,FCN2,PLA2G2A,CRNN,NOS2A,CD19,DEFB129,DEFB103A,APCS,IL1A,IL29,PSG3,CD1D,FOXN1,PLA2G2D,IFNA14,C1QAKLK6,PPBP,DEFB4,CD163,UGT1A1,CCL16	0.0435416
GO:0008544 Epidermis development	12	TGM5,FOXN1,LAMC2,KRT25C,SPRR2E,ALOX12B,LOR,SPRR3,IVL,FLG,KRTHB3,LCE5A	0.0448448

## Sheet: Table S3C
TABLE S3C
Polycomb Repressive Complex 2 (PCR2) target genes and promoter class distribution on NB-specific genes.
PCR2 target gene was considered when a minimum of one PCR2 mark was identified.
Promoter Classes: HCP= High density promoter type, ICP= Intermediate density promoter type, LCP= Low density promoter type, Mixed= Mixed density promoter type.
		Number of genes (%)
	Total	Hypermethylated	Hypomethylated
PCR2 target genes	1276 (9.63)	3 (13.04)	11 (3.35)
Non PCR2 target genes	10990 (83)	17 (73.9)	285 (86.89)
Non identified	974 (7.35)	3 (13.04)	32 (9.75)
Promoter class
HCP	7080 (53.47)	5 (21.73)	30 (9.14)
ICP	1547 (11.68)	8 (34.78)	44 (13.41)
LCP	2993 (22.6)	5 (21.73)	224 (68.29)
Mixed	1255 (9.47)	3 (13.04)	11 (3.35)
Unknown	365 (2.75)	2 (8.69)	19 (5.79)

## Sheet: Table S3D
TABLE S3D
Chromosomal distribution of NB-specific genes.
Number of expected genes = absolute number determined using a hypergeometric probability distribution analysis.
Number of observed genes = absolute number of genes identified by DNA methylation profiling analysis.
Significant p-value<0.05
Chromosomal enrichment (highlighted in Grey) was considered when p-value<0.05 and number of observed genes > number of expected genes
			Hypermethylated				Hypomethylated
			Number of genes				Number of genes
	Chr		Expected	Observed	p-value		Expected	Observed	p-value
	1		1	3	0.221521		37	48	0.00695181
	2		1	2	0.261832		23	21	0.0888762
	3		1	3	0.0957476		20	10	0.00356944
	4		1	0	0.413766		11	7	0.0801882
	5		1	2	0.198247		12	13	0.112995
	6		1	1	0.365768		16	14	0.108871
	7		1	1	0.376818		14	15	0.109034
	8		1	0	0.423952		10	9	0.13813
	9		1	1	0.375003		15	7	0.00744289
	10		1	0	0.392171		12	5	0.015287
	11		1	2	0.237685		24	23	0.0930227
	12		1	2	0.227085		18	19	0.0962305
	13		1	0	0.65697		7	4	0.0922191
	14		1	1	0.365237		9	7	0.13713
	15		1	1	0.355592		11	5	0.0184649
	16		1	0	0.358258		17	9	0.0144836
	17		1	0	0.259306		21	25	0.0443014
	18		1	0	0.724238		6	4	0.136438
	19		2	2	0.341314		27	58	2.81125e-10
	20		1	2	0.121565		13	15	0.0944697
	21		1	0	0.796168		5	9	0.0238624
	22		1	0	0.569181		9	1	0.000706912
